# Supplementary material
Source: publisher site journal article supplement (https://www.dovepress.com/article/396194)
Supplement: Supplementary file 1 [file get_supplementary_file.php]

**Table S1 Clinical characteristics of normal and GDM mothers**

| Variables | Normal (n=20) | GDM (n=20) |
| --- | --- | --- |
| Age (years) | 32.50±3.03 | 34.25±2.71 |
| Height (cm) | 162.05±4.72 | 163.90±6.02 |
| Weight (kg) | 72.34±12.10 | 74.57±8.53 |
| BMI (kg/m2) | 27.55±4.39 | 27.81±3.40 |
| Gestational age delivery (weeks) | 39.50±0.58 | 38.63±1.85 |
| OGTT-0h（mg/dl） | 4.63±0.35 | 5.30±0.55***** |
| OGTT-1h（mg/dl） | 7.88±1.35 | 11.50±0.96***** |
| OGTT-2h（mg/dl） | 6.79±0.82 | 9.54±1.65***** |
| Systolic Blood pressure (mmHg) | 109.65±25.58 | 116.40±10.66 |
| Diastolic Blood pressure (mmHg) | 75.20±8.21 | 76.40±12.37 |

Normal and gestational diabetes mellitus (GDM) mothers were included in this study.

GDM: gestational diabetes mellitus; BMI= body mass index; OGTT: oral glucose tolerance test.

Values are mean ± S.D.

***** P < 0.05 versus corresponding values in Normal.


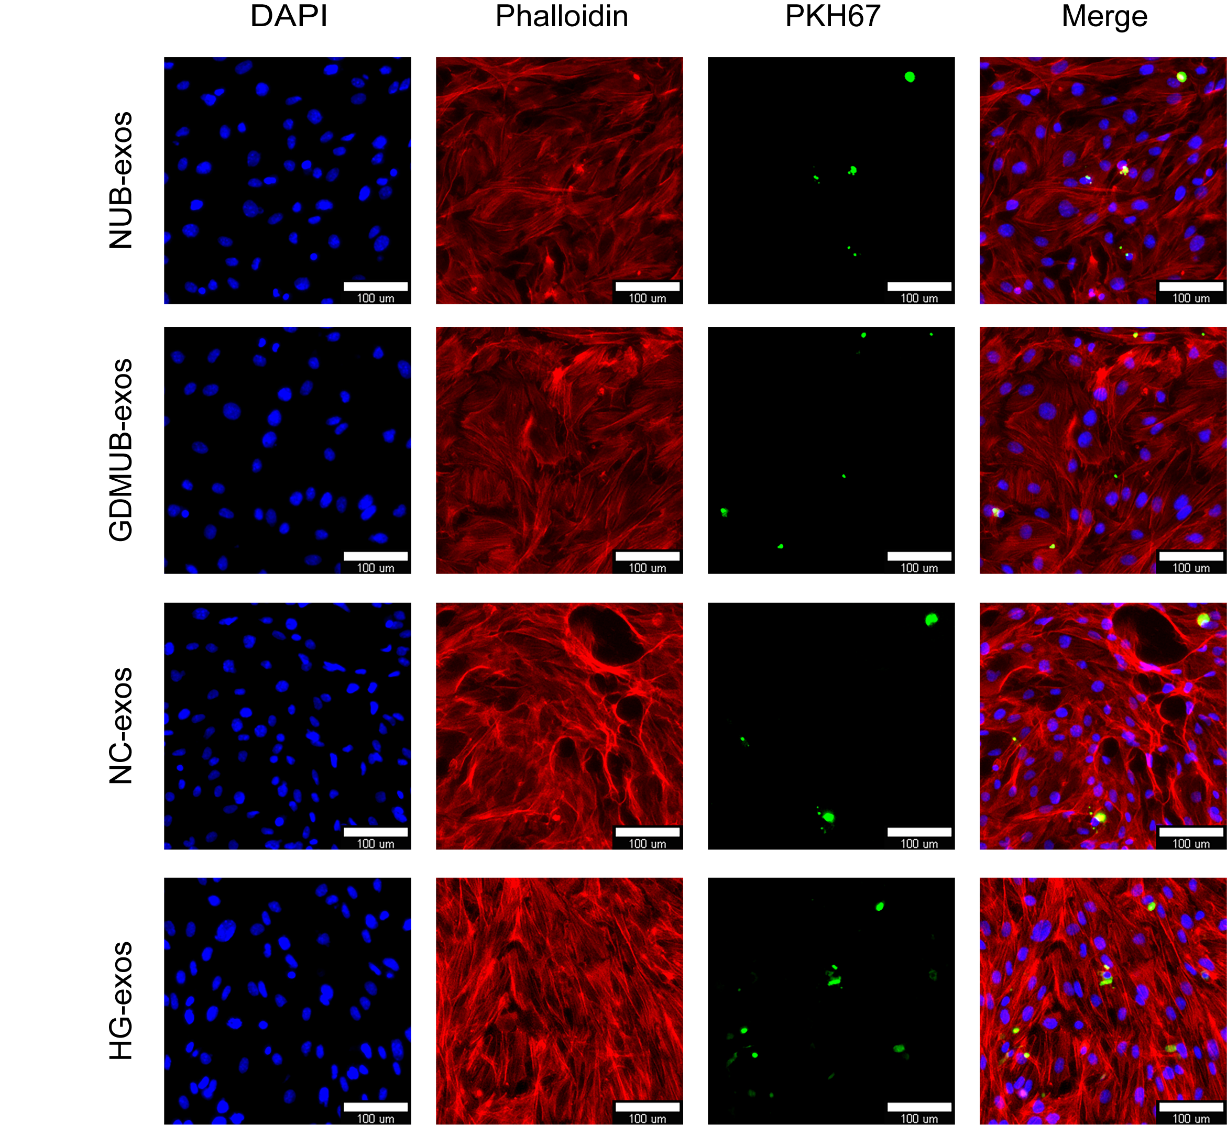


**Figure S1. Biodistribution of PKH67-labeled exosomes in fetal lung in different groups.** Representative fluorescence images of digested fetal lung cell suspensions at embryonic day E15.5. Exosomes from different groups were labeled with PKH67. Nuclei were counterstained with DAPI and the cytoskeleton was counterstained with phalloidin-iFluor594. Scale bars, 100 μm.

**Table S2 Primer sequences used in this study**

| **Gene** | **primer-F (5'-3')** | **primer-R (5'-3')** |
| --- | --- | --- |
| Human SFTPA1 (SPA) | TTGGTCTGTGAGATGCTAGAACT | CAAGGCTGGTCAGTGATTATGG |
| Human SFTPB (SPB) | GCAACGTCCTCCCCTTGAAG | AGTCAGTCTGGTTCTGGAAGTAG |
| Human SFTPC (SPC) | TGGTTCTGGAGATGAGCATTGG | ATGGAGAAGGTGGCAGTGGTA |
| Human SFTPD (SPD) | TCTTGTGGTCTGCGAGTTCTG | GAGGGTCTAAGCCTTGACTTCTG |
| mmu SFTPA1 (SPA) | GAGGAGCTTCAGACTGCACTC | AGACTTTATCCCCCACTGACAG |
| mmu SFTPB (SPB) | CTTGTCCTCCGATGTTCCACTG | ATAGCCTGTTCACTGGTGTTCC |
| mmu SFTPC (SPC) | CCTCGTTGTCGTGGTGATTGTAG | TGCTCATCTCAAGGACCATCTCA |
| mmu SFTPD (SPD) | GATCTTCAGGACAGCAGACTCT | TATGGCAGCATTCTCAGTAGCA |
| mmu Fgf10 | CTGACACATGACCATGGACCAC | TCCAACGTCTGCACTATTTGCTG |
| mmu Vegfa | ACATTGGCTCACTTCCAGAAACAC | TGGTTGGAACCGGCATCTTTA |
| mmu Flt1 | CCCAGCAGCAACTTAGGAAACA | GAGAGTCAGCCACCACCAATG |
| mmu Kdr | ACAGACAGTGGGATGGTCCTTG | GTAGCCACTGGTCTGGTTGGAG |
| mmu Bmp2 | TGACTGGATCGTGGCACCTC | CAGAGTCTGCACTATGGCATGGTTA |
| mmu Bmp4 | TCACCTCAACTCAACCAACCAT | CACCACCTTGTCATACTCATCCA |
| mmu Id1 | TCTACGACATGAACGGCTGCTA | ATCTCCACCTTGCTCACTTTGC |
